# Supplementary material for: A data-driven model for influenza transmission incorporating media effects
Source: PubMed Central journal article supplement (PMC5098988; doi:10.1098/rsos.160481), 2016-10-26
Supplement: rsos160481supp1.pdf [file rsos160481supp1.pdf]

# A data-driven model for influenza transmission incorporating media effects

Lewis Mitchell & Joshua V. Ross

## Appendix

In Figure 1 we show the residuals from linear (blue circles) and quadratic (red crosses) least-square fits to the retweet-infected data from Figure 1 of the main text, for all seasons 2009/10-2014/15 considered in this study. Table 1 shows the relative Akaike weights for the linear and quadratic models for each year, where the relative weights  $p_i$  are given by

$$p_i = \exp\left(\frac{AIC_{\min} - AIC_i}{2}\right)$$

and  $AIC_i$  are the AIC values for each model,  $AIC_{\min}$  is the minimum value of  $AIC_i$ . These weights represent the probability that the  $i$ th model minimises the information loss in describing the data, relative to the best-fitting model [1]. Figure 2 shows relative Akaike weight of the quadratic model as a function of final outbreak size, suggesting that nonlinear effects will increasingly come into play for more severe outbreaks and pandemics.

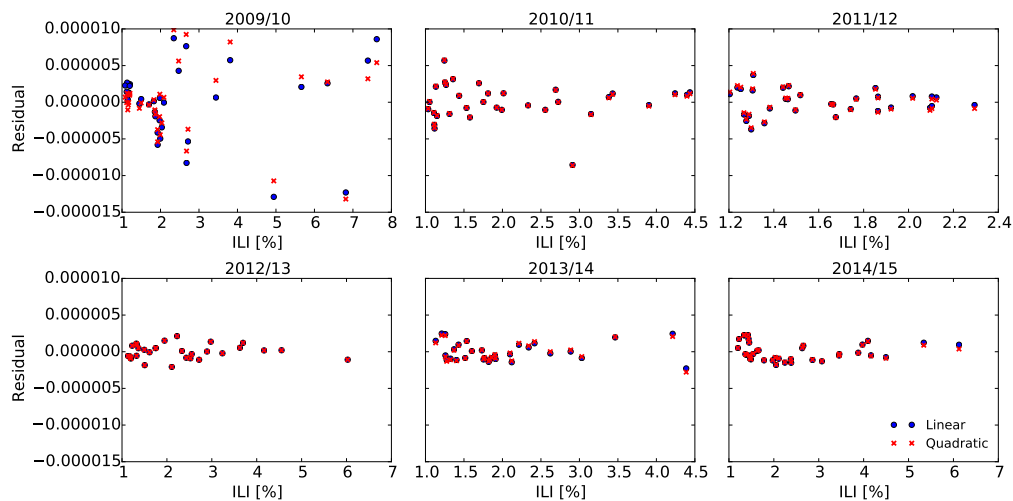

**Figure 1.** Residual plots for linear (blue dots) and quadratic (red crosses) media function models.

**Table 1.** Relative Akaike weights  $p_{\text{lin}}$  and  $p_{\text{quad}}$  for selecting the linear and quadratic models during each influenza season 1998/99-2014/15. Weights for each preferred model are shown in bold.

| year    | $p_{\text{lin}}$ | $p_{\text{quad}}$ |
|---------|------------------|-------------------|
| 2009/10 | 0.4454           | <b>0.5546</b>     |
| 2010/11 | <b>0.7769</b>    | 0.2231            |
| 2011/12 | <b>0.8211</b>    | 0.1789            |
| 2012/13 | <b>0.7781</b>    | 0.2219            |
| 2013/14 | <b>0.6966</b>    | 0.3034            |
| 2014/15 | <b>0.5811</b>    | 0.4189            |

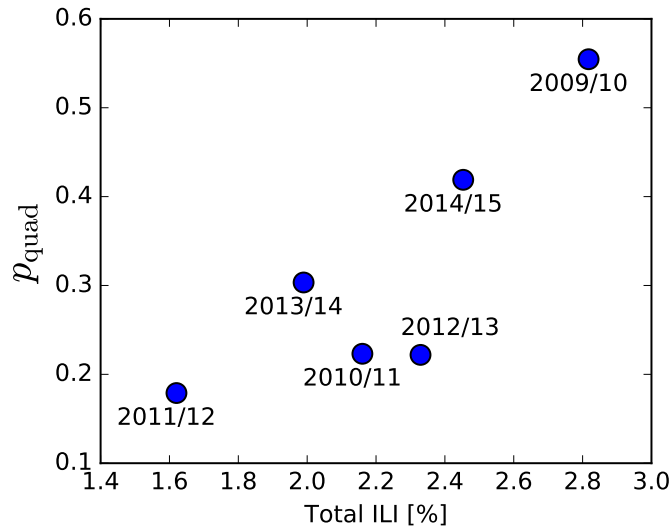

**Figure 2.** Relationship between relative Akaike weight for the quadratic model  $p_{\text{quad}}$  and the observed final outbreak size for each influenza season 2009/10–2014/15.

Table 2 shows the best-fitting parameters for the SEIIR and SEIIR-M models for all seasons 1998/99–2014/15, analogously to Table 1 in the main text. For completeness we also present results where we have used a standard SEIR model with only one exposed and infectious compartment each. Table 3 is an analog of Table 2 from the main text, showing the average conditional probability of selecting each model, and Figure 3 shows example fits to observations of the percentage of new laboratory-confirmed influenza cases per week for the SEIR and SEIIR-M models, similarly to Figure 3 in the main text. In terms of model fitting, the confidence intervals in Table 3 show no significant difference in the likelihood of selecting each media model. Figure 3 suggests that in 2013/14 the media functions  $f_1$ ,  $f_2$  and  $f_3$  fit the data slightly worse using an SEIR model than with an SEIIR model, while the  $f(I) \equiv 1$  and  $f_m$  fit describe the data essentially as well using an SEIR model than with an SEIIR model.

Table 2: Parameters of best fit for SEIIR and SEIIR-M models for all influenza seasons.

|      | model           | $R_0$ | $1/\sigma$<br>(days) | $1/\gamma$<br>(days) | $p_i$ | $PAIC$ |
|------|-----------------|-------|----------------------|----------------------|-------|--------|
| 1998 | $f(I) \equiv 1$ | 1.17  | 1.00                 | 2.41                 | –     | 0.80   |
|      | $f_m$           | 2.00  | 1.92                 | 1.41                 | 0.22  | 0.02   |
|      | $f_1$           | 1.30  | 1.00                 | 2.30                 | 0.02  | 0.15   |
|      | $f_2$           | 1.35  | 1.21                 | 2.06                 | 0.06  | 0.03   |
|      | $f_3$           | 1.58  | 1.98                 | 2.02                 | 5.71  | 0.00   |
| 1999 | $f(I) \equiv 1$ | 1.23  | 1.00                 | 1.63                 | –     | 0.00   |
|      | $f_m$           | 1.47  | 1.28                 | 1.58                 | 0.11  | 0.99   |
|      | $f_1$           | 1.63  | 1.71                 | 1.38                 | 0.03  | 0.01   |
|      | $f_2$           | 2.00  | 1.95                 | 1.92                 | 0.62  | 0.00   |
|      | $f_3$           | 1.76  | 1.90                 | 1.30                 | 4.14  | 0.01   |
|      | $f(I) \equiv 1$ | 1.14  | 1.00                 | 1.26                 | –     | 0.00   |
|      | $f_m$           | 1.30  | 1.00                 | 1.23                 | 0.21  | 1.00   |

Continued on next page

|      | model           | $R_0$ | $1/\sigma$<br>(days) | $1/\gamma$<br>(days) | $p_i$ | $pAIC$ |
|------|-----------------|-------|----------------------|----------------------|-------|--------|
| 2000 | $f_1$           | 1.35  | 1.13                 | 1.13                 | 0.04  | 0.00   |
|      | $f_2$           | 1.33  | 1.99                 | 1.97                 | 1.05  | 0.00   |
|      | $f_3$           | 1.59  | 1.99                 | 1.99                 | 1.06  | 0.00   |
| 2001 | $f(I) \equiv 1$ | 1.10  | 1.00                 | 1.98                 | –     | 0.00   |
|      | $f_m$           | 1.45  | 1.14                 | 1.33                 | 0.24  | 0.89   |
|      | $f_1$           | 1.34  | 1.37                 | 1.32                 | 0.03  | 0.00   |
|      | $f_2$           | 1.38  | 1.29                 | 1.37                 | 0.26  | 0.00   |
| 2002 | $f_3$           | 1.46  | 1.07                 | 1.38                 | 3.15  | 0.11   |
|      | $f(I) \equiv 1$ | 1.13  | 1.00                 | 1.00                 | –     | 0.00   |
|      | $f_m$           | 1.28  | 1.00                 | 1.00                 | 0.29  | 1.00   |
|      | $f_1$           | 1.56  | 1.61                 | 1.55                 | 0.19  | 0.00   |
|      | $f_2$           | 1.28  | 1.35                 | 1.00                 | 0.70  | 0.00   |
| 2003 | $f_3$           | 1.71  | 1.83                 | 1.74                 | 0.54  | 0.00   |
|      | $f(I) \equiv 1$ | 1.17  | 1.00                 | 1.46                 | –     | 1.00   |
|      | $f_m$           | 1.17  | 1.00                 | 1.46                 | 0.00  | 0.00   |
|      | $f_1$           | 1.17  | 1.00                 | 1.46                 | 0.00  | 0.00   |
|      | $f_2$           | 1.17  | 1.00                 | 1.46                 | 0.00  | 0.00   |
| 2004 | $f_3$           | 1.19  | 1.00                 | 1.46                 | 56.78 | 0.00   |
|      | $f(I) \equiv 1$ | 1.11  | 1.00                 | 1.30                 | –     | 0.00   |
|      | $f_m$           | 1.36  | 1.02                 | 1.00                 | 0.30  | 1.00   |
|      | $f_1$           | 2.00  | 2.00                 | 2.07                 | 0.68  | 0.00   |
|      | $f_2$           | 1.23  | 1.16                 | 1.10                 | 0.41  | 0.00   |
| 2005 | $f_3$           | 1.14  | 1.09                 | 1.20                 | 33.94 | 0.00   |
|      | $f(I) \equiv 1$ | 1.10  | 1.00                 | 1.09                 | –     | 0.00   |
|      | $f_m$           | 1.24  | 1.00                 | 1.01                 | 0.28  | 1.00   |
|      | $f_1$           | 1.10  | 1.78                 | 2.95                 | 0.14  | 0.00   |
|      | $f_2$           | 1.33  | 1.00                 | 1.00                 | 2.58  | 0.00   |
| 2006 | $f_3$           | 1.19  | 1.00                 | 1.29                 | 4.23  | 0.00   |
|      | $f(I) \equiv 1$ | 1.12  | 1.00                 | 1.22                 | –     | 0.00   |
|      | $f_m$           | 1.40  | 1.00                 | 1.00                 | 0.36  | 1.00   |
|      | $f_1$           | 1.32  | 1.04                 | 1.16                 | 0.05  | 0.00   |
|      | $f_2$           | 1.62  | 1.04                 | 1.00                 | 2.51  | 0.00   |
| 2007 | $f_3$           | 1.54  | 1.78                 | 1.00                 | 1.24  | 0.00   |
|      | $f(I) \equiv 1$ | 1.12  | 1.00                 | 1.64                 | –     | 0.01   |
|      | $f_m$           | 1.26  | 1.00                 | 1.42                 | 0.13  | 0.99   |
|      | $f_1$           | 1.45  | 1.49                 | 1.09                 | 0.04  | 0.00   |
|      | $f_2$           | 1.72  | 1.27                 | 1.00                 | 0.66  | 0.00   |
| 2008 | $f_3$           | 1.42  | 1.84                 | 1.84                 | 2.11  | 0.00   |
|      | $f(I) \equiv 1$ | 1.14  | 2.83                 | 1.06                 | –     | 0.00   |
|      | $f_m$           | 1.28  | 1.00                 | 1.07                 | 0.27  | 0.96   |
|      | $f_1$           | 1.40  | 1.13                 | 1.00                 | 0.06  | 0.00   |
|      | $f_2$           | 1.25  | 1.02                 | 1.02                 | 0.57  | 0.04   |
| 2009 | $f_3$           | 2.00  | 1.18                 | 1.13                 | 0.48  | 0.00   |
|      | $f(I) \equiv 1$ | 1.16  | 1.00                 | 1.74                 | –     | 0.00   |
|      | $f_m$           | 1.10  | 1.10                 | 3.39                 | 0.06  | 0.00   |
|      | $f_1$           | 1.39  | 1.28                 | 1.46                 | 0.03  | 0.91   |
|      | $f_2$           | 1.41  | 1.64                 | 1.19                 | 0.11  | 0.00   |
|      | $f_3$           | 1.53  | 1.57                 | 1.28                 | 4.83  | 0.09   |
|      | $f(I) \equiv 1$ | 1.11  | 1.00                 | 1.31                 | –     | 0.35   |

Continued on next page

|      | model           | $R_0$ | $1/\sigma$<br>(days) | $1/\gamma$<br>(days) | $p_i$ | $p_{AIC}$ |
|------|-----------------|-------|----------------------|----------------------|-------|-----------|
| 2010 | $f_m$           | 1.16  | 1.28                 | 1.04                 | 0.06  | 0.00      |
|      | $f_1$           | 1.30  | 1.86                 | 2.32                 | 0.22  | 0.00      |
|      | $f_2$           | 1.28  | 1.02                 | 1.01                 | 0.33  | 0.56      |
|      | $f_3$           | 1.21  | 1.00                 | 1.16                 | 7.44  | 0.09      |
| 2011 | $f(I) \equiv 1$ | 1.10  | 2.75                 | 1.09                 | –     | 0.00      |
|      | $f_m$           | 1.24  | 1.00                 | 1.00                 | 0.48  | 1.00      |
|      | $f_1$           | 1.57  | 1.00                 | 1.33                 | 0.38  | 0.00      |
|      | $f_2$           | 1.10  | 1.03                 | 1.42                 | 0.35  | 0.00      |
|      | $f_3$           | 1.25  | 1.09                 | 1.56                 | 1.24  | 0.00      |
| 2012 | $f(I) \equiv 1$ | 1.15  | 1.00                 | 1.94                 | –     | 0.00      |
|      | $f_m$           | 1.44  | 1.30                 | 1.70                 | 0.21  | 0.96      |
|      | $f_1$           | 1.57  | 1.63                 | 1.51                 | 0.07  | 0.01      |
|      | $f_2$           | 1.41  | 1.51                 | 1.57                 | 0.22  | 0.00      |
|      | $f_3$           | 1.54  | 1.44                 | 1.61                 | 2.96  | 0.03      |
| 2013 | $f(I) \equiv 1$ | 1.16  | 1.00                 | 1.25                 | –     | 0.00      |
|      | $f_m$           | 1.53  | 1.78                 | 1.00                 | 0.34  | 1.00      |
|      | $f_1$           | 1.68  | 2.13                 | 1.01                 | 0.07  | 0.00      |
|      | $f_2$           | 1.33  | 1.33                 | 1.19                 | 0.35  | 0.00      |
|      | $f_3$           | 1.75  | 1.23                 | 1.13                 | 1.19  | 0.00      |
| 2014 | $f(I) \equiv 1$ | 1.19  | 1.00                 | 2.46                 | –     | 0.00      |
|      | $f_m$           | 1.70  | 1.67                 | 2.00                 | 0.18  | 0.81      |
|      | $f_1$           | 1.65  | 2.00                 | 2.02                 | 0.06  | 0.00      |
|      | $f_2$           | 1.57  | 1.68                 | 2.02                 | 0.12  | 0.02      |
|      | $f_3$           | 1.96  | 1.93                 | 1.85                 | 2.64  | 0.17      |

**Table 3.** Average probability of selecting each SEIR-type model over the 1998/99–2014/15 seasons. (cf. Table 2 of the main text.) The 2009/10 pandemic influenza season has been excluded.

|                                | $p_{AIC}$ | 95% CI     |
|--------------------------------|-----------|------------|
| $f(I) \equiv 1$                | 0.0635    | [0,0.1714] |
| $f_m(I) = 1 - p_m I$           | 0.9122    | [0.7974,1] |
| $f_1(I) = \exp(-\gamma p_1 I)$ | 0.0010    | [0,0.0026] |
| $f_2(I) = \frac{1}{1+p_2 I^2}$ | 0.0134    | [0,0.0388] |
| $f_3(I) = \frac{1}{1+p_3 I}$   | 0.0100    | [0,0.0255] |

## References

- 1 Anderson DR. Model Based Inference in the Life Sciences. New York: Springer; 2008.

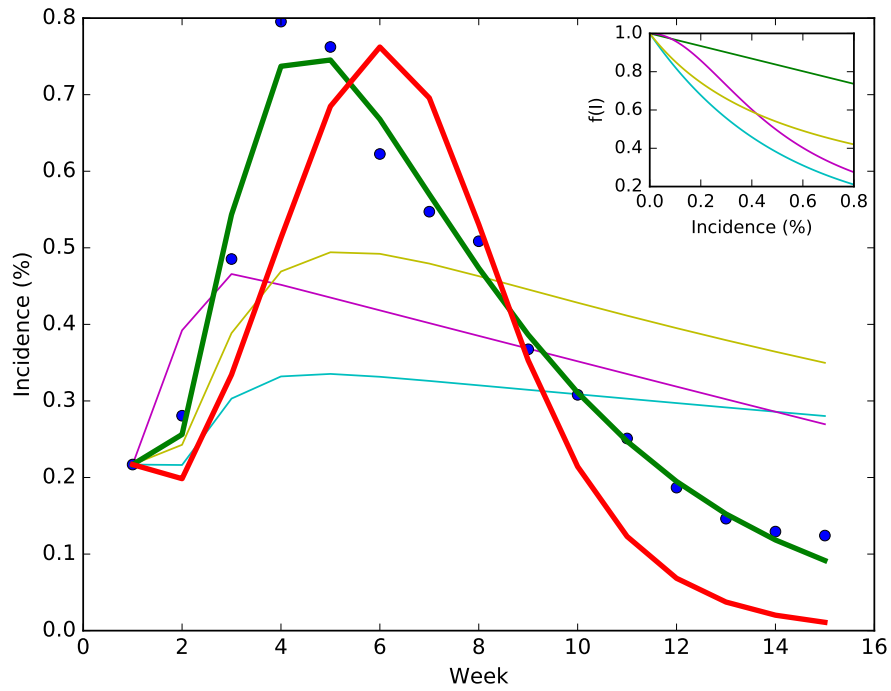

**Figure 3.** Best model fits to data from 2013/14 flu season. Weekly influenza data (blue dots), and model fits for SEIR model without media function (red), with media function (green), and variations  $f_1$  (cyan),  $f_2$  (magenta) and  $f_3$  (yellow), for the 2013/14 influenza season (USA). (cf. Figure 3 from the main text.)
